# Supplementary material
Source: Springer Nature journal article supplement (https://www.springermedizin.de/resource/supplementary/13195_2014_211_MOESM2_ESM.pdf/9688484)

# AD vs DLB and PDD

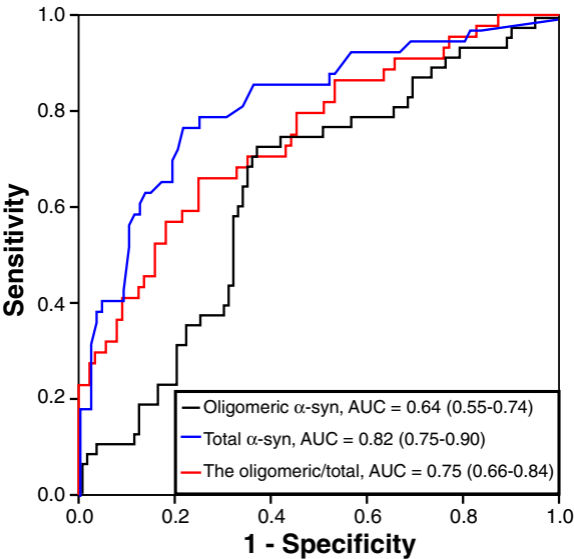

Supplement: MOESM2 [file 9688484]
